# Supplementary material
Source: Copernicus journal article supplement (doi:10.5194/essd-2026-109)
Supplement: Supplementary file 1 [file essd-2026-109-supplement.pdf]

*Supplement of*

**A Comprehensive Global Aquatic N<sub>2</sub>O Emission Database (GANED): Unravelling N<sub>2</sub>O Emission Patterns from Different Water Bodies**

**Jing Wei et al.**

5 *Correspondence to:* \*Jing Wei ([sarawei.em@gmail.com](mailto:sarawei.em@gmail.com))

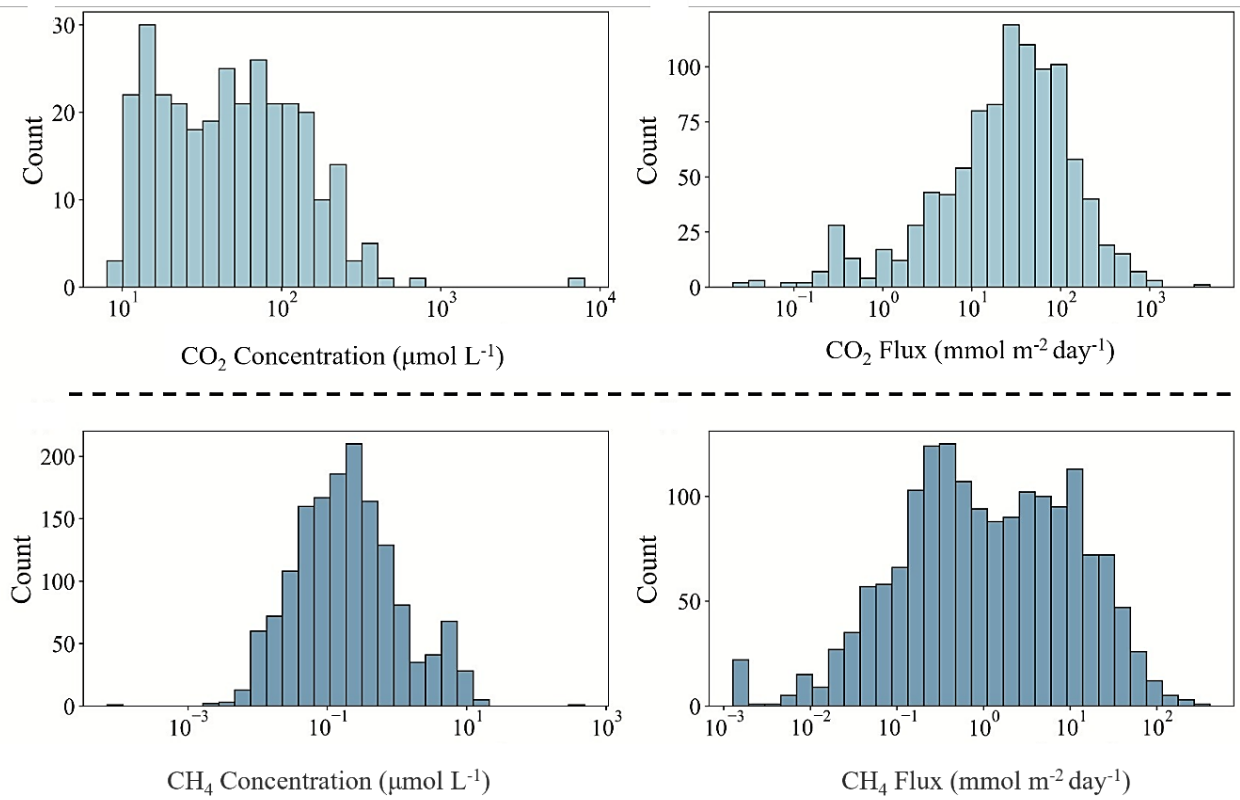

**Figure S1: Histograms of CO<sub>2</sub>, CH<sub>4</sub> concentrations and fluxes in GANED, excluding values reported as below detection limits or zero**

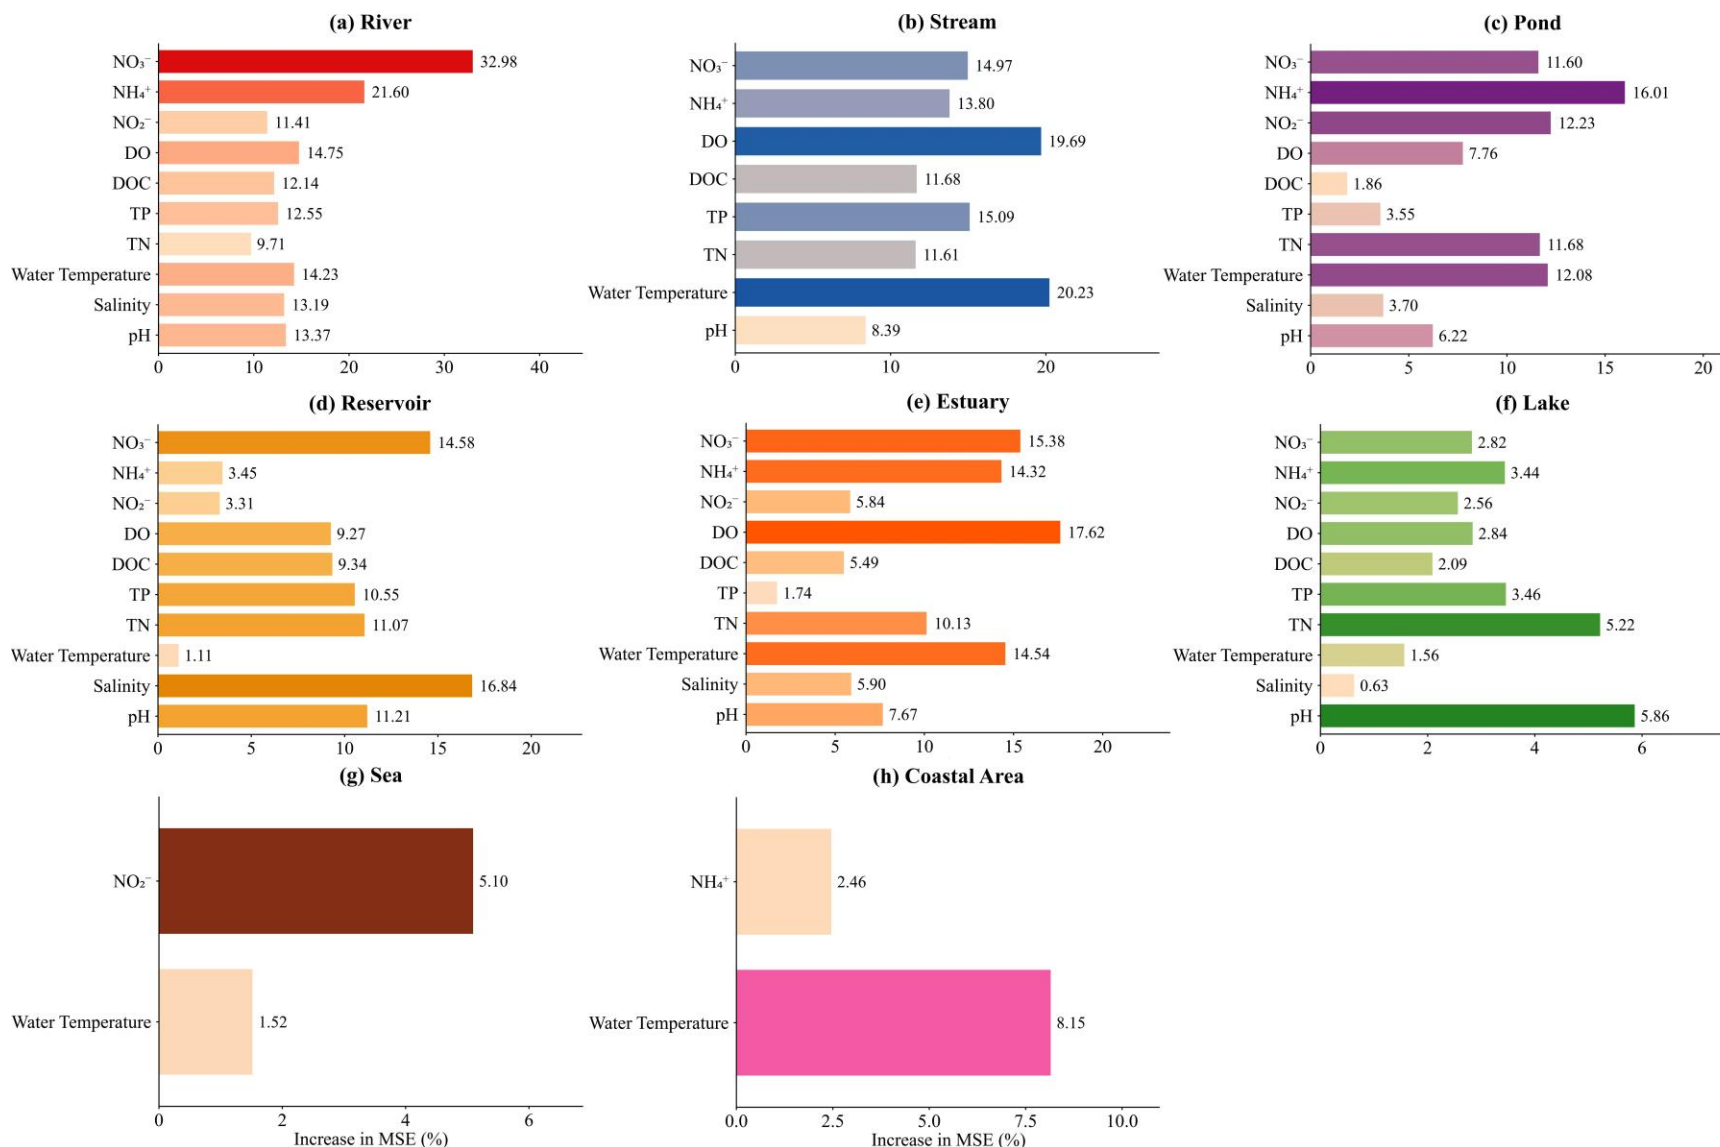

10  
 11 **Figure S2: Random Forest (RF) permutation feature importance (% increase in mean squared error, MSE%) for predicting N<sub>2</sub>O flux in GANED, stratified by aquatic**  
 12 **types (a) River, (b) Stream, (c) Pond, (d) Reservoir, (e) Estuary, (f) Lake (g) Sea, and (h) Coastal Area. Only systems with sufficient complete cases are shown with full**  
 13 **predictor sets. Predictor abbreviations: Nitrate, NO<sub>3</sub><sup>-</sup>; ammonium, NH<sub>4</sub><sup>+</sup>; nitrite, NO<sub>2</sub><sup>-</sup>; Temp., Water temperature; Sal, salinity; dissolved oxygen, DO; dissolved organic**  
 14 **carbon, DOC; total phosphorus, TP; total nitrogen, TN; and pH.**

15 **Table S1. Summary statistics for CO<sub>2</sub>, and CH<sub>4</sub>, concentrations and fluxes.**

| <b>Gas (and type)</b>                        | <b>Mean</b> | <b>Median</b> | <b>Max</b> | <b>Min</b> | <b>SD</b> | <b>CV</b> |
|----------------------------------------------|-------------|---------------|------------|------------|-----------|-----------|
| Concentration (μmol L <sup>-1</sup> )        |             |               |            |            |           |           |
| CO <sub>2</sub>                              | 100.79      | 48.71         | 8011.36    | 8.05       | 462.19    | 458.55    |
| CH <sub>4</sub>                              | 1.14        | 0.18          | 491.39     | 0          | 12.65     | 1106.98   |
| Flux (mmol m <sup>-2</sup> d <sup>-1</sup> ) |             |               |            |            |           |           |
| CO <sub>2</sub>                              | 51.99       | 16.17         | 4760.00    | -120.10    | 171.79    | 330.44    |
| CH <sub>4</sub>                              | 7.08        | 0.81          | 410.11     | -17.58     | 19.75     | 279.06    |

16

17 **Table S2. Overall descriptive statistics of N<sub>2</sub>O fluxes and concentrations in GANED.**

| <b>Variable</b>                                               | <b>Count</b> | <b>Mean</b> | <b>Median</b> | <b>Std. Dev.</b> | <b>Min</b> | <b>Max</b> |
|---------------------------------------------------------------|--------------|-------------|---------------|------------------|------------|------------|
| N <sub>2</sub> O Flux (mmol m <sup>-2</sup> d <sup>-1</sup> ) | 7386         | 5.92        | 0.198         | 90.85            | -260.97    | 4597.9     |
| N <sub>2</sub> O Concentration (μM)                           | 5127         | 0.072       | 0.0005        | 0.65             | 0.0        | 12.23      |

18

19 **Table S3. Summary statistics of GANED-Concentration by Aquatic-type.**

| <b>Aquatic-type</b> | <b>count</b> | <b>mean</b> | <b>median</b> | <b>std</b> | <b>min</b> | <b>max</b> |
|---------------------|--------------|-------------|---------------|------------|------------|------------|
| Lake                | 369          | 0.406       | 0.001         | 1.553      | 0.000      | 7.498      |
| River               | 2622         | 0.077       | 0.001         | 0.683      | 0.000      | 12.233     |
| Stream              | 471          | 0.029       | 0.001         | 0.121      | 0.000      | 0.865      |
| Pond                | 421          | 0.004       | 0.000         | 0.048      | 0.000      | 0.913      |
| Estuary             | 513          | 0.001       | 0.000         | 0.001      | 0.000      | 0.009      |
| Reservoir           | 632          | 0.001       | 0.000         | 0.001      | 0.000      | 0.011      |
| Coastal Area        | 41           | 0.001       | 0.000         | 0.001      | 0.000      | 0.003      |
| Sea                 | 58           | 0.000       | 0.000         | 0.000      | 0.000      | 0.002      |

20

21 **Table S4. Summary statistics of GANED-flux by Aquatic-type.**

| <b>Aquatic-type</b> | <b>count</b> | <b>mean</b> | <b>median</b> | <b>std</b> | <b>min</b> | <b>max</b> |
|---------------------|--------------|-------------|---------------|------------|------------|------------|
| River               | 1835         | 15.45       | 0.30          | 175.75     | -5.12      | 4597.90    |
| Lake                | 976          | 10.34       | 0.16          | 63.13      | -260.97    | 1024.31    |
| Stream              | 425          | 3.75        | 0.68          | 13.21      | -0.62      | 138.71     |
| Estuary             | 439          | 1.74        | 0.28          | 6.92       | -3.90      | 70.80      |
| Reservoir           | 1109         | 0.94        | 0.19          | 3.49       | -6.47      | 48.90      |
| Pond                | 2488         | 0.72        | 0.13          | 2.85       | -12.31     | 70.18      |
| Coastal Area        | 45           | 0.62        | 0.28          | 0.69       | -0.04      | 3.00       |
| Sea                 | 69           | 0.55        | 0.02          | 3.84       | -0.05      | 31.98      |

22

23 **Table S5. Number of observations for all variables by continent. Variable titles correspond to GANED column titles and are defined in appendix A1-A4.**

| Variable                       | Unit                                 | Africa | Antarctica | Asia | Central America | Europe | North America | Oceania | South America | Total |
|--------------------------------|--------------------------------------|--------|------------|------|-----------------|--------|---------------|---------|---------------|-------|
| Sites                          | -                                    | 185    | 10         | 1814 | 1               | 341    | 464           | 143     | 44            | 3002  |
| Depth                          | m                                    | 43     | 0          | 1865 | 0               | 3      | 125           | 70      | 14            | 2120  |
| Elevation                      | m                                    | 0      | 0          | 152  | 0               | 5      | 34            | 0       | 0             | 191   |
| Surface area                   | km <sup>2</sup>                      | 0      | 0          | 1388 | 0               | 0      | 0             | 0       | 0             | 1388  |
| N <sub>2</sub> O flux          | mmol m <sup>-2</sup> d <sup>-1</sup> | 50     | 5          | 6384 | 1               | 249    | 507           | 144     | 46            | 7386  |
| N <sub>2</sub> O concentration | μmol L <sup>-1</sup>                 | 354    | 7          | 3150 | 0               | 866    | 577           | 159     | 17            | 5130  |
| CO <sub>2</sub> flux           | mmol m <sup>-2</sup> d <sup>-1</sup> | 0      | 0          | 1205 | 0               | 39     | 27            | 6       | 0             | 1277  |
| CO <sub>2</sub> concentration  | μmol L <sup>-1</sup>                 | 0      | 0          | 228  | 0               | 41     | 35            | 0       | 0             | 304   |
| CH <sub>4</sub> flux           | mmol m <sup>-2</sup> d <sup>-1</sup> | 0      | 0          | 1690 | 0               | 42     | 27            | 22      | 0             | 1781  |
| CH <sub>4</sub> concentration  | μmol L <sup>-1</sup>                 | 67     | 0          | 712  | 0               | 723    | 35            | 0       | 0             | 1537  |
| DIN                            | mg-N L <sup>-1</sup>                 | 0      | 0          | 246  | 0               | 16     | 98            | 0       | 0             | 360   |
| DON                            | mg-N L <sup>-1</sup>                 | 0      | 0          | 32   | 0               | 11     | 8             | 0       | 0             | 51    |
| TN                             | mg L <sup>-1</sup>                   | 0      | 0          | 1775 | 0               | 62     | 20            | 10      | 0             | 1867  |
| NH <sub>4</sub> <sup>+</sup>   | mg-N L <sup>-1</sup>                 | 302    | 3          | 3102 | 0               | 822    | 143           | 82      | 1             | 4455  |
| NO <sub>2</sub> <sup>-</sup>   | mg-N L <sup>-1</sup>                 | 219    | 0          | 1482 | 0               | 692    | 28            | 0       | 2             | 2423  |
| NO <sub>3</sub> <sup>-</sup>   | mg-N L <sup>-1</sup>                 | 302    | 4          | 3378 | 0               | 833    | 207           | 89      | 16            | 4829  |
| Water temperature              | °C                                   | 354    | 2          | 3047 | 0               | 797    | 390           | 139     | 3             | 4732  |
| Salinity                       | ‰                                    | 0      | 0          | 739  | 0               | 22     | 0             | 66      | 0             | 827   |
| pH                             | -                                    | 116    | 0          | 2215 | 0               | 107    | 61            | 45      | 6             | 2550  |
| DO                             | mg L <sup>-1</sup>                   | 11     | 0          | 3002 | 0               | 67     | 431           | 56      | 14            | 3581  |
| Flow velocity                  | m s <sup>-1</sup>                    | 5      | 0          | 339  | 0               | 5      | 21            | 20      | 0             | 390   |
| Redox potential                | mV                                   | 0      | 0          | 209  | 0               | 0      | 0             | 0       | 0             | 209   |
| SO <sub>4</sub> <sup>2-</sup>  | mg L <sup>-1</sup>                   | 0      | 0          | 153  | 0               | 0      | 0             | 0       | 0             | 153   |
| TP                             | mg L <sup>-1</sup>                   | 0      | 0          | 1034 | 0               | 45     | 20            | 0       | 0             | 1099  |
| Wind speed                     | m s <sup>-1</sup>                    | 0      | 0          | 960  | 0               | 49     | 27            | 17      | 6             | 1059  |
| Chl a                          | mg L <sup>-1</sup>                   | 0      | 0          | 1033 | 0               | 442    | 102           | 0       | 0             | 1577  |
| DOC                            | mg L <sup>-1</sup>                   | 221    | 0          | 974  | 0               | 324    | 130           | 25      | 6             | 1680  |
| DIC                            | mg L <sup>-1</sup>                   | 0      | 0          | 21   | 0               | 0      | 0             | 0       | 0             | 21    |

24

25 **Table S6. Summary statistics for environmental variables. Variable titles correspond to GANED column titles and are**  
 26 **defined in Appendix A4**

| <b>Variables</b>             | <b>Unit</b>          | <b>Mean</b> | <b>Median</b> | <b>Max</b> | <b>Min</b> | <b>SD</b> | <b>CV</b> |
|------------------------------|----------------------|-------------|---------------|------------|------------|-----------|-----------|
| NH <sub>4</sub> <sup>+</sup> | mg-N L <sup>-1</sup> | 2.75        | 0.20          | 596.02     | -0.14      | 25.85     | 941.65    |
| NO <sub>2</sub> <sup>-</sup> | mg-N L <sup>-1</sup> | 1.18        | 0.02          | 316.40     | -0.01      | 11.84     | 1006.42   |
| NO <sub>3</sub> <sup>-</sup> | mg-N L <sup>-1</sup> | 2.22        | 1.00          | 665.42     | 0.00       | 11.25     | 507.30    |
| DO                           | mg L <sup>-1</sup>   | 8.15        | 7.57          | 95.00      | 0.16       | 6.28      | 77.10     |
| DOC                          | mg L <sup>-1</sup>   | 8.56        | 4.40          | 109.57     | 0.20       | 13.57     | 158.61    |
| TN                           | mg L <sup>-1</sup>   | 6.86        | 2.29          | 2070.00    | 0.07       | 73.59     | 1072.22   |
| TP                           | mg L <sup>-1</sup>   | 283.80      | 142.13        | 4941.41    | 0.04       | 467.79    | 164.83    |
| Water temperature            | °C                   | 19.01       | 19.80         | 36.00      | -1.09      | 7.80      | 41.03     |
| Salinity                     | ‰                    | 13.37       | 5.37          | 67.01      | 0.00       | 15.41     | 115.26    |
| pH                           | -                    | 8.01        | 8.03          | 11.03      | 3.48       | 0.89      | 11.14     |

27
